# Supplementary material for: Inflammatory Proteins and Clinical Response to Psychological Therapy in Patients with Depression: An Exploratory Study
Source: MDPI journal article supplement (doi:10.3390/jcm9123918), 2020-12-02
Supplement: s1 [file s1]

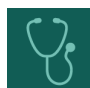

Supplement 1 Inflammatory marker levels in therapy responders and non-responders.

| Protein      | ----- Pre-treatment comparison ----- |       |               |        | ----- Post-treatment comparison ----- |        |               |       |
|--------------|--------------------------------------|-------|---------------|--------|---------------------------------------|--------|---------------|-------|
|              | Responder                            |       | Non-responder |        | Responder                             |        | Non-responder |       |
|              | Ig-mean                              | SD    | Ig-mean       | SD     | Ig-mean                               | SD     | Ig-mean       | SD    |
| TNF $\alpha$ | 0.289                                | 0.108 | 0.348         | 0.303  | 0.108                                 | 0.338  | 0.123         | 0.111 |
| IL-6         | -0.318                               | 0.286 | -0.170        | -0.298 | 0.298                                 | -0.079 | 0.299         | 0.276 |
| CRP          | 6.201                                | 0.539 | 6.388         | 6.172  | 0.506                                 | 6.599  | 0.568         | 0.557 |
| IL-10        | -0.732                               | 0.407 | -0.675        | -0.652 | 0.289                                 | -0.567 | 0.259         | 0.304 |
| IL-8         | 0.951                                | 0.182 | 0.979         | 1.012  | 0.130                                 | 1.081  | 0.175         | 0.165 |
| IL-12        | 1.307                                | 0.163 | 1.305         | 1.359  | 0.144                                 | 1.415  | 0.180         | 0.181 |
| IL-7         | 1.967                                | 0.222 | 1.968         | 1.970  | 0.200                                 | 1.937  | 0.264         | 0.278 |
| IL-15        | 0.447                                | 0.105 | 0.439         | 0.481  | 0.115                                 | 0.530  | 0.105         | 0.127 |
| IL-16        | 2.325                                | 0.177 | 2.329         | 2.300  | 0.147                                 | 2.334  | 0.163         | 0.162 |
| IL-17        | 0.256                                | 0.390 | 0.199         | 0.309  | 0.347                                 | 0.288  | 0.279         | 0.303 |
| MCP1         | 2.457                                | 0.152 | 2.470         | 2.467  | 0.168                                 | 2.549  | 0.218         | 0.172 |
| MCP4         | 2.170                                | 0.189 | 2.182         | 2.142  | 0.151                                 | 2.272  | 0.220         | 0.226 |
| Mip1b        | 2.089                                | 0.193 | 2.145         | 2.115  | 0.159                                 | 2.117  | 0.135         | 0.179 |
| Eotaxin      | 2.296                                | 0.208 | 2.326         | 2.317  | 0.213                                 | 2.359  | 0.254         | 0.223 |
| sICAM1       | 6.481                                | 0.415 | 6.546         | 6.413  | 0.468                                 | 6.646  | 0.332         | 0.353 |
| sVCAM1       | 5.668                                | 0.097 | 5.717         | 5.684  | 0.100                                 | 5.758  | 0.124         | 0.111 |
| SAA          | 5.775                                | 0.097 | 5.785         | 5.782  | 0.092                                 | 5.825  | 0.114         | 0.085 |
| TARC         | 2.472                                | 0.226 | 2.526         | 2.451  | 0.266                                 | 2.720  | 0.336         | 0.297 |
| Tie2         | 3.625                                | 0.192 | 3.703         | 3.607  | 0.223                                 | 3.682  | 0.231         | 0.176 |
| IP-10        | 2.326                                | 0.154 | 2.368         | 2.332  | 0.151                                 | 2.383  | 0.191         | 0.241 |
| IFN $\gamma$ | 0.707                                | 0.285 | 0.592         | 0.701  | 0.316                                 | 0.538  | 0.320         | 0.249 |
| Eotaxin3     | 0.742                                | 0.491 | 0.795         | 0.743  | 0.496                                 | 0.916  | 0.404         | 0.442 |
| TNF $\beta$  | -0.725                               | 0.541 | -0.663        | -0.664 | 0.469                                 | -0.578 | 0.388         | 0.428 |

Protein levels before and after therapy in responders and non-responders.

Ig-mean = log-transformed mean value in pg/ml (except for CRP which was converted into mg/L), SD = standard deviation.

## Supplement 2: Post-hoc analyses adjusting for other potentially important confounders

Elevated IL-6 at baseline predicted non-response. Baseline IL-6 was also associated with age and physical illness, so a post-hoc logistic regression including these two variables was conducted. In the absence of indicated multi-collinearity, IL-6 (and neither other variable) remained significant: OR = 0.153 [95% CI 0.027, 0.861],  $p = 0.033$ .

Elevated TNF $\alpha$  at baseline predicted non-response. Baseline TNF $\alpha$  was also associated with age, physical illness and the number of comorbidities. A post-hoc logistic regression including these three variables indicated that, without significant multi-collinearity, TNF $\alpha$  remained a significant predictor of non-response (OR = 0.009 [95% CI 0.000, 0.698],  $p = 0.034$  while none of the other variables appeared significantly associated.

Attenuated IFN $\gamma$  at baseline predicted non-response. Baseline IFN $\gamma$  was also negatively associated with early life stress (CTQ score). In the post-hoc logistic regression containing these two variables, IFN $\gamma$  was only associated with response at a trend level (OR = 5.178 [95% CI 0.974, 27.536],  $p = 0.054$ ) while CTQ was not a significant predictor.

After treatment, non-response was cross-sectionally associated with elevated CRP; CRP was positively associated with age (already adjusted for in a priori logistic regression) and therefore a subsequent regression was not conducted.

After treatment, non-response was cross-sectionally associated with elevated MCP4, which was also correlated with age and physical illness. A post-hoc logistic regression including these factors suggested that only MCP4 was independently associated with non-response (OR = 0.020 [95% CI 0.000, 0.942],  $p = 0.047$ ).

After treatment, non-response was cross-sectionally associated with elevated TARC. TARC was also positively associated with physical illness. A post-hoc logistic regression including these two variables indicated that TARC (but not physical illness) remained associated with non-response (OR = 0.030 [95% CI 0.002, 0.520],  $p = 0.016$ ) although poor model fitting was indicated (Hosmer and Lemeshow Chi-square statistic 17.359,  $p = 0.027$ ).

After treatment, non-response was cross-sectionally associated with attenuated IFN $\gamma$ . At this timepoint, IFN $\gamma$  was also negatively associated with number of psychiatric comorbidities. The post-hoc logistic regression including these two variables rendered IFN $\gamma$  a non-significant contributor (OR = 2.716 [95% CI 0.283, 26.075],  $p = 0.387$ ) whereas the number of comorbidities was higher in non-responders (OR = 0.640 [95% CI 0.423, 0.969],  $p = 0.035$ ).

When not adjusting for age, gender and BMI, IL-6 was significantly higher in non-responders. IL-6 was indeed positively associated with age, but in the post-hoc logistic regression containing only IL-6 and age, IL-6 remained weakly significant (OR = 0.062 [95% CI 0.004, 0.924],  $p = 0.044$ ) while age was not significantly associated with response.

Similarly, when not adjusting for age, gender and BMI, sICAM1 was significantly higher in non-responders. sICAM was also associated with age as well as physical illness. The post-hoc logistic regression including these three factors suggested that none of the variables were significantly and independently associated with response (sICAM1 being the strongest contributor with OR = 0.002 [95% CI 0.000, 1.540],  $p = 0.066$ ).
